# Supplementary material for: Constructing a rhenium complex supported on g-C3N4 for efficient visible-light-driven photoreduction of CO2 to CO via a novel Z-scheme heterojunction
Source: Royal Society of Chemistry journal article supplement (doi:10.1039/d3ta01502e), 2023-01-01
Supplement: d3ta01502e1.pdf [file d3ta01502e1.pdf]

## Supporting Information

### Constructing Rhenium complex supported on g-C<sub>3</sub>N<sub>4</sub> for Efficient Visible-Light-Driven Photoreduction of CO<sub>2</sub> to CO via a novel Z-scheme Heterojunction

Phuong Ngoc Nguyen,<sup>1,2</sup> Trang Thanh Tran,<sup>1</sup> Quynh Anh Thi Nguyen,<sup>3</sup> Yoshiyuki Kawazoe,<sup>4,5,6</sup> S.V. Prabhakar Vattikuti,<sup>7</sup> Long V. Le,<sup>8</sup> Viet Quoc Bui,<sup>3,\*</sup> Tuan Manh Nguyen,<sup>2,9,\*</sup> Nam Nguyen Dang<sup>10,11</sup>

<sup>1</sup>Institute of Applied Materials Science, Vietnam Academy of Science and Technology (VAST), 29TL Street, Thanh Loc Ward, District 12, Ho Chi Minh City 700000, Vietnam

<sup>2</sup>Graduate University of Science and Technology, VAST, 18 Hoang Quoc Viet Street, Cau Giay, Ha Noi 100000, Vietnam

<sup>3</sup>Advanced Institute of Science and Technology, The University of Danang, 41 Le Duan, Danang, Vietnam

<sup>4</sup>New Industry Creation Hatchery Center, Tohoku University, 6-6-4 Aramaki Aza Aoba, Aoba-ku, Sendai, Miyagi, 980-8579 Japan.

<sup>5</sup>School of Physics, Institute of Science, Suranaree University of Technology, 111 University Avenue, Nakhon Ratchasima, 30000 Thailand.

<sup>6</sup>Physics and Nanotechnology, SRM Institute of Science and Technology, Kattankurathur, Tamil Nadu, 603203 India

<sup>7</sup>School of Mechanical Engineering, Yeungnam University, Gyeongsan, Republic of Korea

<sup>8</sup>Institute of Materials Science, Vietnam Academy of Science and Technology (VAST), Hanoi 100000, Vietnam

<sup>9</sup>Institute of Applied Informatics and Mechanics, Vietnam Academy of Science and Technology (VAST), 291 Dien Bien Phu Street, Ward 7, District 3, Ho Chi Minh City 700000, Vietnam

<sup>10</sup>Future Materials & Devices Lab., Institute of Fundamental and Applied Sciences, Duy Tan University, Ho Chi Minh City 700000, Vietnam

<sup>11</sup>The Faculty of Environmental and Chemical Engineering, Duy Tan University, Danang 550000, Vietnam

\*E-mail addresses: [nguyenmanhtuan@iams.vast.vn](mailto:nguyenmanhtuan@iams.vast.vn) and [bqviet@ac.udn.vn](mailto:bqviet@ac.udn.vn)

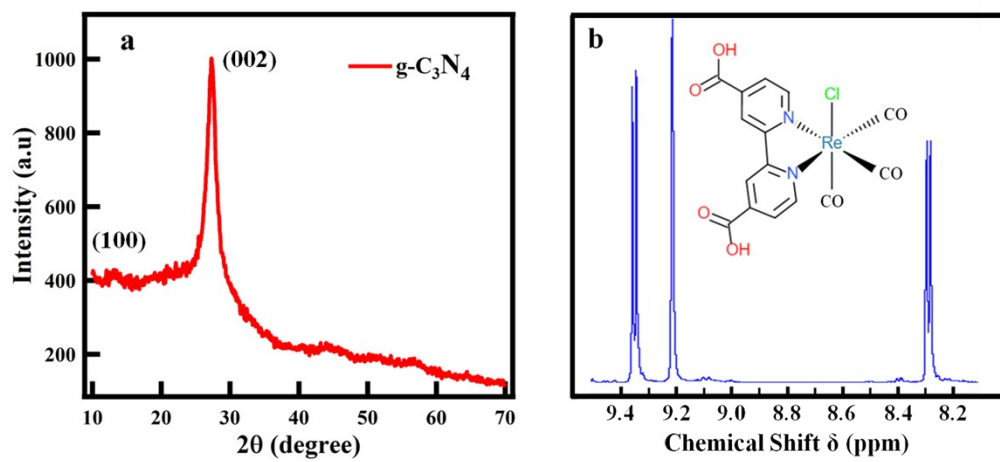

Figure S1: XRD pattern of g-C<sub>3</sub>N<sub>4</sub> (a), <sup>1</sup>H NMR of Re(bpy-COOH) (b).

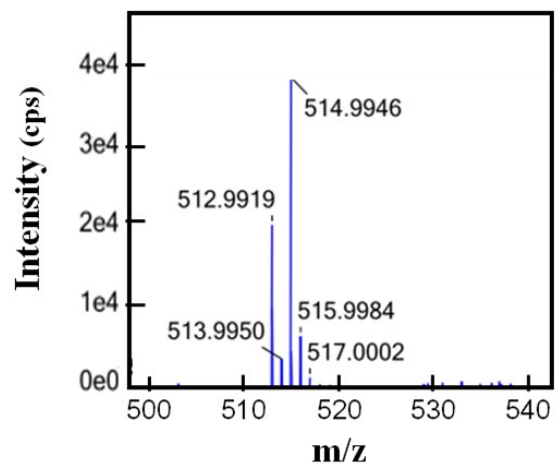

Figure S2. ESI-MS of Re(bpy-COOH) in MeCN under drift voltage at 20 mV.

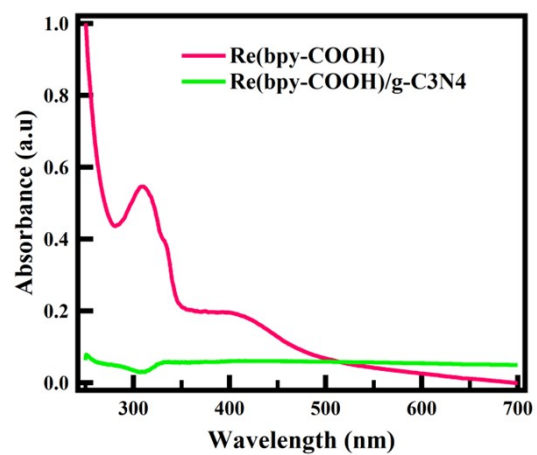

Figure S3: UV/Vis absorption spectrum of Re(bpy-COOH) and Re(bpy-COOH)/g-C<sub>3</sub>N<sub>4</sub> in MeCN at room temperature.

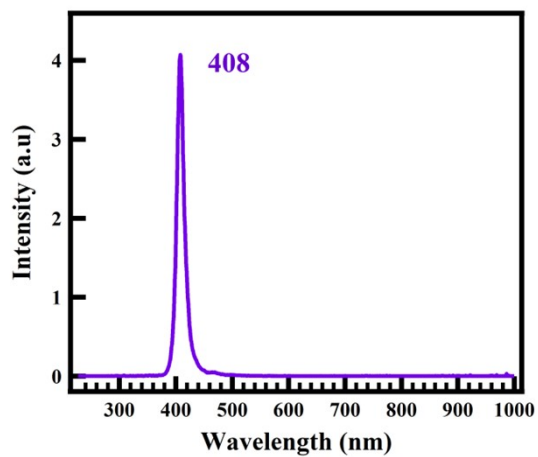

Figure S4: Light source spectrum of the photo-irradiation system used in the experiment (light intensity at a distance of 5 cm and 11 cm are  $210\text{W}/\text{m}^2$  and  $78\text{W}/\text{m}^2$ , respectively).

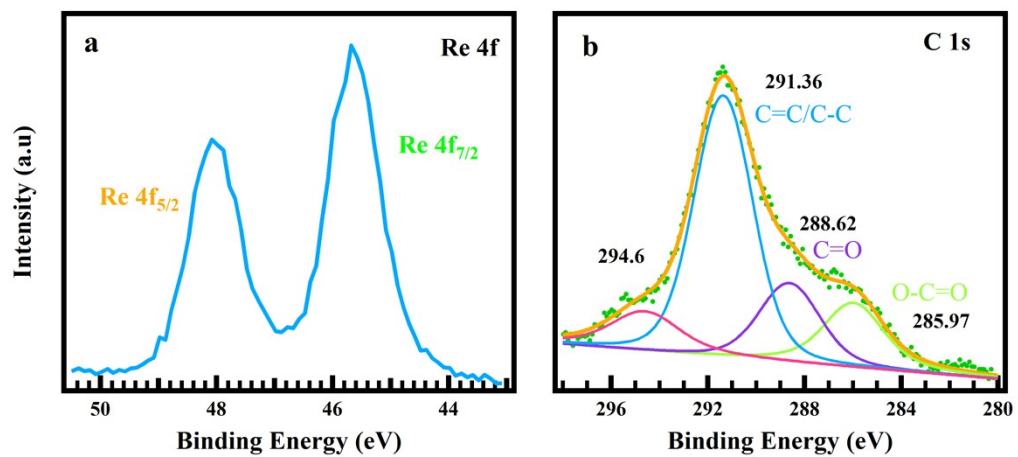

Figure S5: High resolution scan of Re 4f (a) and C 1s (b) of Re(bpy-COOH).

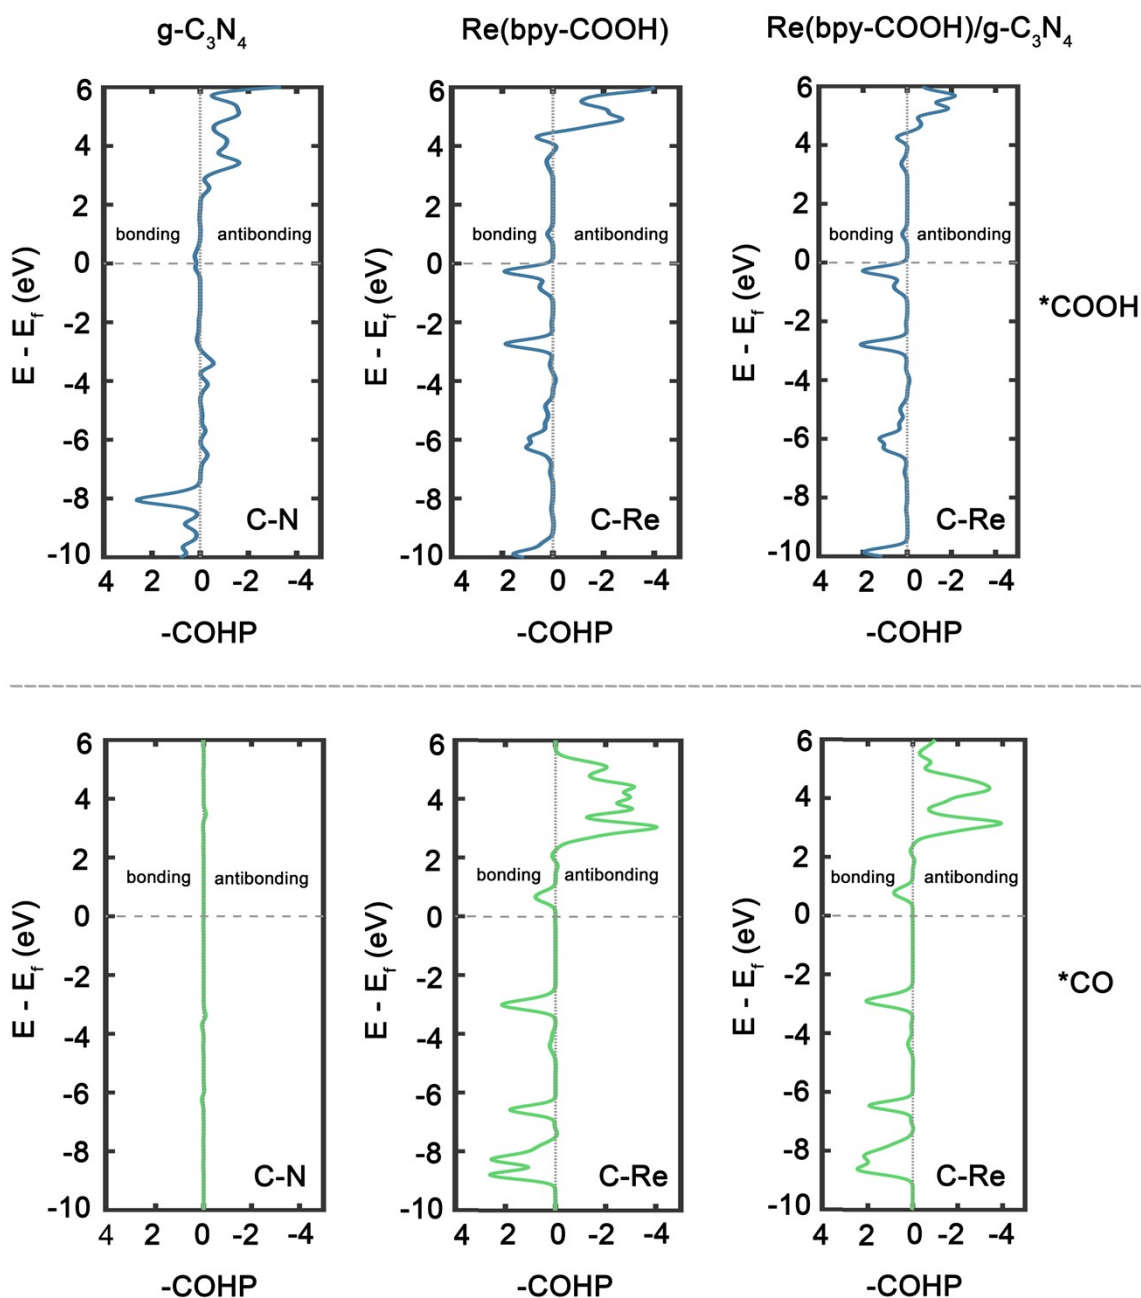

Figure S6. Crystal orbital Hamilton population (COHP) for  $*\text{COOH}$  (blue) and  $*\text{CO}$  (green) intermediates in  $g\text{-C}_3\text{N}_4$  (left panels),  $\text{Re}(\text{bpy-COOH})$  (middle panels), and  $\text{Re}(\text{bpy-COOH})/g\text{-C}_3\text{N}_4$  (right panels), respectively. Fermi level is shifted to zero. Positive (negative) value of  $-\text{COHP}$  indicates the bonding (antibonding) interactions. For  $g\text{-C}_3\text{N}_4$ , C-N interaction is considered, while C-Re interaction is for  $\text{Re}(\text{bpy-COOH})$  and  $\text{Re}(\text{bpy-COOH})/g\text{-C}_3\text{N}_4$ .

Table S1: Emission decay parameters of Re(bpy-COOH)/g-C<sub>3</sub>N<sub>4</sub> and g-C<sub>3</sub>N<sub>4</sub> excited and emitted at the wavelength of 355 nm and 450 nm, respectively.

| Materials                                    | A <sub>0</sub> | A <sub>1</sub> | A <sub>2</sub> | A <sub>3</sub> | τ <sub>1</sub><br>(ms) | τ <sub>2</sub><br>(ms) | τ <sub>3</sub><br>(ms) | B <sub>1</sub> | B <sub>2</sub> | B <sub>3</sub> | τ<br>(ms)  |
|----------------------------------------------|----------------|----------------|----------------|----------------|------------------------|------------------------|------------------------|----------------|----------------|----------------|------------|
| Re(bpy-COOH)/g-C <sub>3</sub> N <sub>4</sub> | 0.001<br>6     | 0.821<br>5     | 0.088<br>0     | 0.117<br>2     | 2.824<br>2             | 10.69<br>30            | 10.22<br>30            | 0.800<br>1     | 0.085<br>7     | 0.114<br>2     | 4.343<br>5 |
| g-C <sub>3</sub> N <sub>4</sub>              | 0.005<br>1     | 0.859<br>7     | 0.071<br>1     | 0.134<br>9     | 2.262<br>5             | 8.053<br>2             | 8.747<br>7             | 0.806<br>7     | 0.066<br>7     | 0.126<br>6     | 3.469<br>7 |

The emission decay curve was fitted by triple- exponential function, as shown in eq. 1. The average lifetime τ and the relative ratio B<sub>i</sub> were calculated by following functions (2) and (3), as presented below:

$$f(x) = A_0 + A_1 * \exp\left(-\frac{x}{\tau_1}\right) + A_2 * \exp\left(-\frac{x}{\tau_2}\right) + A_3 * \exp\left(-\frac{x}{\tau_3}\right) \quad (1)$$

$$\tau = \frac{\sum_{i=1}^3 B_i * \tau_i}{\sum_{i=1}^3 B_i} \quad (2)$$

$$B_i = A_i / \sum_{i=1}^3 A_i \quad (3)$$



Table S2. Mulliken charge and charge transfer between each atom of \*COOH, \*CO and g-C<sub>3</sub>N<sub>4</sub>, Re(bpy-COOH), Re(bpy-COOH)/g-C<sub>3</sub>N<sub>4</sub>, respectively. The positive (negative) value in charge transfer column represents the loss (gain) electron.

|       | Atoms | g-C <sub>3</sub> N <sub>4</sub> |                 | Re(bpy-COOH)    |                 | Re(bpy-COOH)/g-C <sub>3</sub> N <sub>4</sub> |                 |
|-------|-------|---------------------------------|-----------------|-----------------|-----------------|----------------------------------------------|-----------------|
|       |       | Mulliken charge                 | Charge transfer | Mulliken charge | Charge transfer | Mulliken charge                              | Charge transfer |
| *COOH | C     | -3.34                           | 0.66            | -3.96           | 0.04            | -3.87                                        | 0.13            |
|       | O     | -6.54                           | -0.54           | -6.45           | -0.45           | -6.5                                         | -0.50           |
|       | O     | -6.59                           | -0.59           | -6.53           | -0.53           | -6.56                                        | -0.56           |
|       | H     | -0.48                           | 0.52            | -0.57           | 0.43            | -0.55                                        | 0.45            |
|       | Total |                                 | 0.05            |                 | -0.51           |                                              | -0.48           |
| *CO   | C     | -3.61                           | 0.39            | -3.89           | 0.11            | -3.83                                        | 0.17            |
|       | O     | -6.38                           | -0.38           | -6.26           | -0.26           | -6.30                                        | -0.30           |
|       | Total |                                 | 0.01            |                 | -0.15           |                                              | -0.13           |

## Control experiment

The observed CO might include not only from photocatalytic CO<sub>2</sub>RR but also from CO photo-degradation of Re(bpy-COOH), we conduct photocatalytic activity of Re(bpy-COOH) under Ar gas. The amount of CO production from photocatalytic CO<sub>2</sub> reaction was determined by subtracting the CO produced by Re(bpy-COOH) photo-degradation. ( $\text{TON}_{\text{CO}} = \text{TON}_{\text{CO\_PCO2RRexp}} - \text{TON}_{\text{COphoto-deg}}$ ) (PCO<sub>2</sub>RR: photocatalytic CO<sub>2</sub> reduction reaction)

The reaction solution containing Re(bpy-COOH) (0.6 mM) in DMF:TEOA mixed solvent (5:1 v/v) was placed in a visible-light-transparent vial (5mL) and purged with Ar to remove all of air. The reaction vial was irradiated by a light-source system (15 W energy-saving light bulk, center wavelength  $\lambda = 408$  nm, and light intensity at a distance of 5 cm is 210W/m<sup>2</sup>) in the photoreaction box. During irradiation, the solution was being stirred slowly by a magnetic bar and the temperature of the solution was controlled at room temperature by constant temperature system. The gaseous reaction products were identified by gas chromatography (GC Clarus 680-PerkinElmer), which was equipped with TCD detector, molecular sieve column (LxI.D.: 30 m x 0.32 mm), and Ar carrier gas. The CO produced by Re(bpy-COOH) photo-degradation was shown in table S3.

Table S3: The CO produced by Re(bpy-COOH) photo-degradation

| Time (minute) | $\text{TON}_{\text{COphoto-deg}}$ |
|---------------|-----------------------------------|
| 20            | 0.323                             |
| 40            | 0.364                             |
| 60            | 0.398                             |

## Time-resolved photoluminescence measurement

For TRPL measurement, the 355-nm laser diode was used as the excitation source. The signals were recorded by using a 0.6-m grating monochromator (Jobin-Yvon HRD1) and then detected by a fast photomultiplier (Hamamatsu model H733, with a rise time of 700 ps). Averaging the multi-pulses at each spectral point using a 1.0 GHz digital oscilloscope (Tektronix DPO 4102B) improved the signal-to-noise ratio.

The emission lifetime of Re(bpy-COOH) was confirmed in nanosecond timescale with the average lifetime was 8.22 ns, which reached agreement with the previous report <sup>1</sup>.

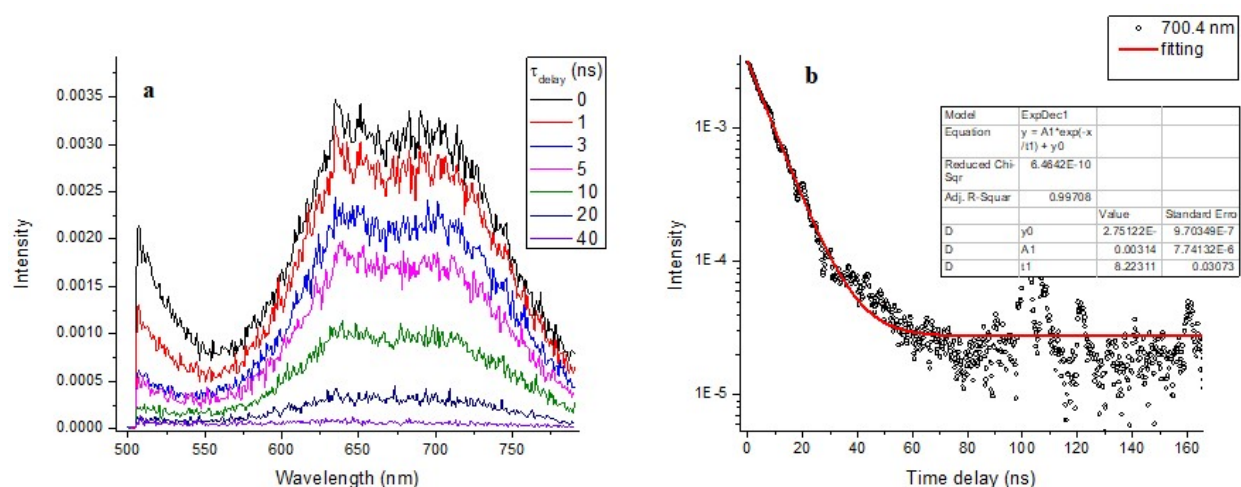

Figure S7. Time-resolved photoluminescence (TRPL) of Re(bpy-COOH) in methanol (a) and emission decay profile of Re(bpy-COOH) (b).

## Reference

1. Nahhas, A. El *et al.* Ultrafast excited-state dynamics of  $[\text{Re}(\text{L})(\text{CO})_3(\text{bpy})]$  n complexes: Involvement of the solvent. *J. Phys. Chem. A* **114**, 6361–6369 (2010).
